# Supplementary material for: Electrochemiluminescence of Ru(bpy)32+/thioacetamide and its application for the sensitive determination of hepatotoxic thioacetamide
Source: Royal Society of Chemistry journal article supplement (doi:10.1039/d1an00862e), 2021-01-01
Supplement: d1an00862e1.pdf [file d1an00862e1.pdf]

## Supporting Information

### **Electrochemiluminescence of Ru(bpy)<sub>3</sub><sup>2+</sup>/Thioacetamide and its Application for Sensitive Detection of Hepatotoxic Thioacetamide**

Shimeles Addisu Kitte,<sup>[a,b]</sup> Fuad Abduro Bushira,<sup>[a,b,c]</sup> Haijuan Li,<sup>[a]</sup> and Yongdong Jin\*<sup>[a,c]</sup>

<sup>[a]</sup>State Key Laboratory of Electroanalytical Chemistry, Changchun Institute of Applied Chemistry, Chinese Academy of Sciences, Changchun 130022, P. R. China

<sup>[b]</sup>Department of Chemistry, College of Natural Sciences, Jimma University, P. O. Box 378, Jimma, Ethiopia

<sup>[c]</sup> University of Science and Technology of China, Hefei 230026, P. R. China

E-mail: [ydjjin@ciac.ac.cn](mailto:ydjjin@ciac.ac.cn)

## Table of Content

|                                                                                                                                                                                                                                                                                                                                                                                                     |    |
|-----------------------------------------------------------------------------------------------------------------------------------------------------------------------------------------------------------------------------------------------------------------------------------------------------------------------------------------------------------------------------------------------------|----|
| Calculation of Limits of Detection (LOD) .....                                                                                                                                                                                                                                                                                                                                                      | S2 |
| Figure S1: ECL emission intensity and cyclic voltammograms (the inset) of 1 mM Ru(bpy) <sub>3</sub> <sup>2+</sup> and, 0.5 mM TAA at scan rates: 10, 20, 40, 60, 80, 100, 150 and 200 mVs <sup>-1</sup> (A) and the linear relationship of TAA between the ECL intensity or the anodic current and the square root of the scan rate ( $v^{1/2}$ ) (B) measured at the GCE in 0.1 M PBS pH 7.5. .... | S3 |
| Figure S2. The ECL stability of solution containing 1 mM Ru(bpy) <sub>3</sub> <sup>2+</sup> and 0.5 mM TAA measured at the GCE in 0.1 M PBS pH 7.5. ....                                                                                                                                                                                                                                            | S3 |
| Figure S3. Chronoamperometric ECL emission signals of the Ru(bpy) <sub>3</sub> <sup>2+</sup> -TAA ECL system on additions of different concentration of TAA in orange juice and waste water samples. (Inset: A bar graph showing the %recovery on additions of different concentration of TAA). ....                                                                                                | S4 |
| Table S1: Real sample analysis results of TAA in Orange juice and waste water samples. ....                                                                                                                                                                                                                                                                                                         | S4 |
| Table S2: Repeatability and reproducibility study for Ru(bpy) <sub>3</sub> <sup>2+</sup> -TAA ECL System. ....                                                                                                                                                                                                                                                                                      | S5 |
| References .....                                                                                                                                                                                                                                                                                                                                                                                    | S5 |

### Calculation of Limits of Detection (LOD)

LOD was calculated as follows.<sup>1,2</sup> The lowest distinguishable signal  $S_m$  is calculated as the sum of the average blank signal  $X_{bl}$  plus a multiple  $k$  of the standard deviation of the blank ( $\sigma_{bl}$ ). That is

$$S_m = X_{bl} + 3\sigma_{bl} \dots \dots \dots (1)$$

The corrected signal,  $S_m - X_{bl}$  is proportional to sample concentration.

$$S_m - X_{bl} = m \times \text{sample concentration} \dots (2)$$

where  $m$  is the slope from the calibration curve. Substituting  $X_{bl}$  from Eq.(1) for  $S_m$  in Eq.(2), LOD can be obtained.

$$LOD = \frac{3\sigma}{m} \dots \dots \dots (3)$$

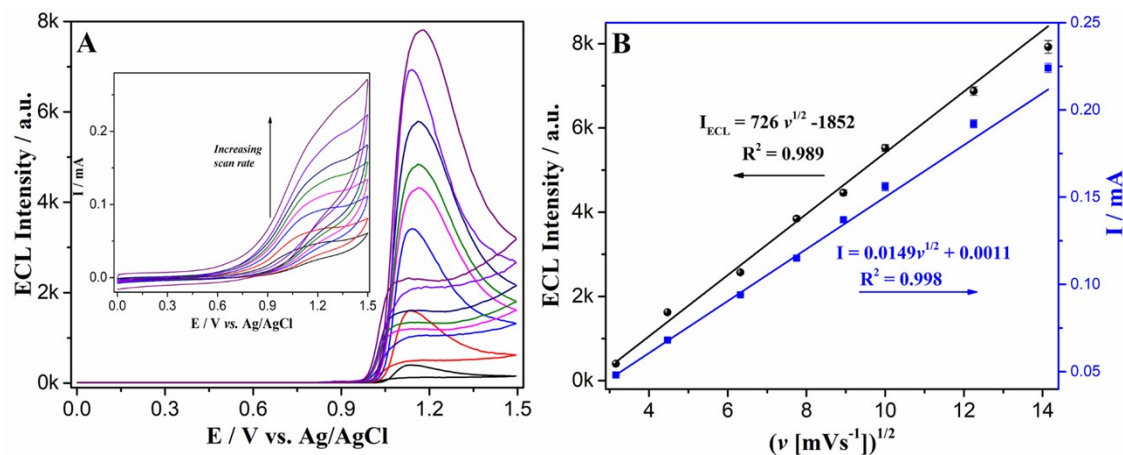

**Figure S1:** ECL emission intensity and cyclic voltammograms (the inset) of 1 mM  $\text{Ru}(\text{bpy})_3^{2+}$  and, 0.5 mM TAA at scan rates: 10, 20, 40, 60, 80, 100, 150 and 200  $\text{mVs}^{-1}$  (A) and the linear relationship of TAA between the ECL intensity or the anodic current and the square root of the scan rate ( $v^{1/2}$ ) (B) measured at the GCE in 0.1 M PBS pH 7.5.

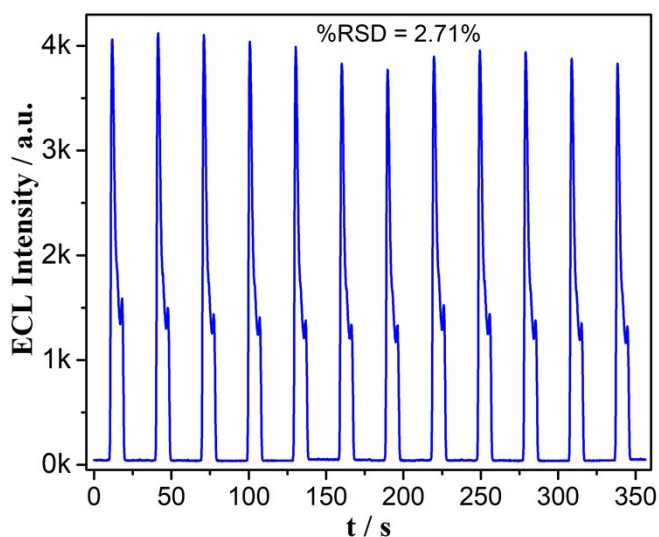

**Figure S2.** The ECL stability of solution containing 1 mM  $\text{Ru}(\text{bpy})_3^{2+}$  and 0.5 mM TAA measured at the GCE in 0.1 M PBS pH 7.5.

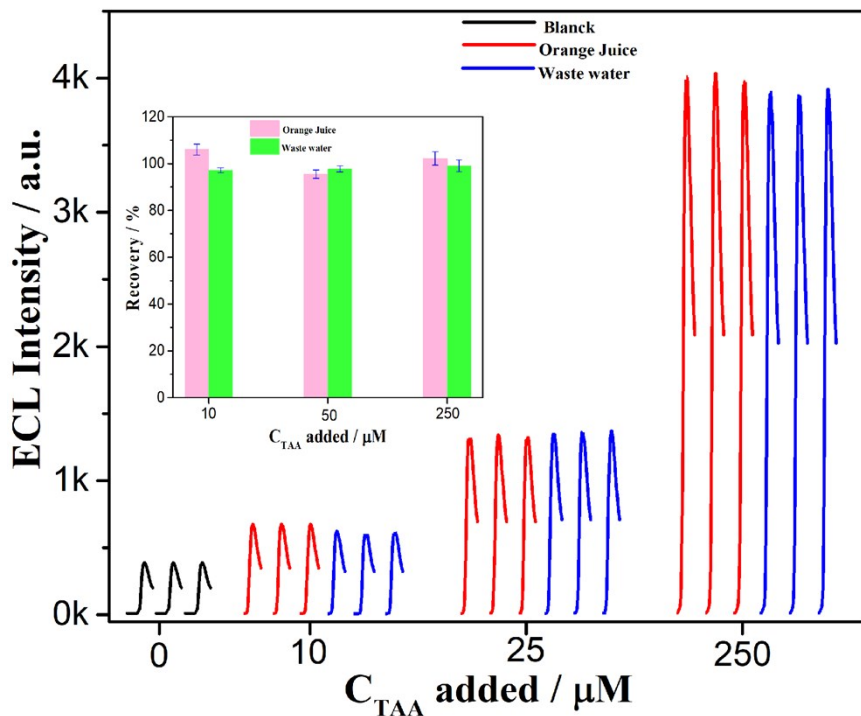

**Figure S3.** Chronoamperometric ECL emission signals of the  $\text{Ru}(\text{bpy})_3^{2+}$ -TAA ECL system on additions of different concentration of TAA in orange juice and waste water samples. (Inset: A bar graph showing the %recovery on additions of different concentration of TAA).

**Table S1:** Real sample analysis results of TAA in Orange juice and waste water samples.

| Sample       | Detected ( $\mu\text{M}$ ) | Added ( $\mu\text{M}$ ) | Found ( $\mu\text{M}$ ) | RSD (%) | Recovery (%) |
|--------------|----------------------------|-------------------------|-------------------------|---------|--------------|
| Orange Juice | 0                          | -                       | -                       | 3.2     | -            |
|              |                            | 10                      | 10.6                    | 2.4     | 106.0        |
|              |                            | 50                      | 47.75                   | 1.79    | 95.5         |
|              |                            | 250                     | 255.59                  | 2.9     | 102.2        |
| Waste Water  | 0                          | -                       | -                       | -       | -            |
|              |                            | 10                      | 9.72                    | 1.06    | 97.2         |
|              |                            | 50                      | 48.89                   | 1.35    | 97.78        |
|              |                            | 250                     | 247.82                  | 2.52    | 99.13        |

**Table S2:** Repeatability and reproducibility study for Ru(bpy)<sub>3</sub><sup>2+</sup>-TAA ECL System.

| <b>Precision</b>               | <b>Conc. of TAA (μM)</b> | <b>%Recovery (mean)</b> | <b>%RSD</b> |
|--------------------------------|--------------------------|-------------------------|-------------|
| Repeatability<br>(Intra-day)   | 50                       | 99.04                   | 1.54        |
|                                | 100                      | 97.64                   | 2.87        |
|                                | 500                      | 105.33                  | 2.25        |
| Reproducibility<br>(Inter-day) | 50                       | 97.71                   | 2.86        |
|                                | 100                      | 104.62                  | 3.21        |
|                                | 500                      | 97.12                   | 3.52        |

### References

- (1) Harris, D. C. *Quantitative Chemical Analysis*, 8th ed.; W. H. Freeman and Company, 2010.
- (2) Douglas A. Skoog; F. James Holler; Crouch, S. R. *Principles of Instrumental Analysis*, 7th ed.; Cengage Learning, 2016.
